# Supplementary material for: The LncRNA HOTAIRM1 Promotes Tamoxifen Resistance by Mediating HOXA1 Expression in ER+ Breast Cancer Cells
Source: PubMed Central journal article supplement (PMC7150441; doi:10.7150/jca.38728), 2020-03-13
Supplement: jcav11p3416s1.pdf [file jcav11p3416s1.pdf]

## Supplementary Information

The LncRNA HOTAIRM1 Promotes Tamoxifen Resistance by Mediating HOXA1 Expression in ER+ Breast Cancer Cells

Clara Yuri Kim<sup>1,2</sup>, Ji Hoon Oh<sup>1</sup>, Ji-Yeon Lee<sup>1,\*</sup>, and Myoung Hee Kim<sup>1,2,\*</sup>

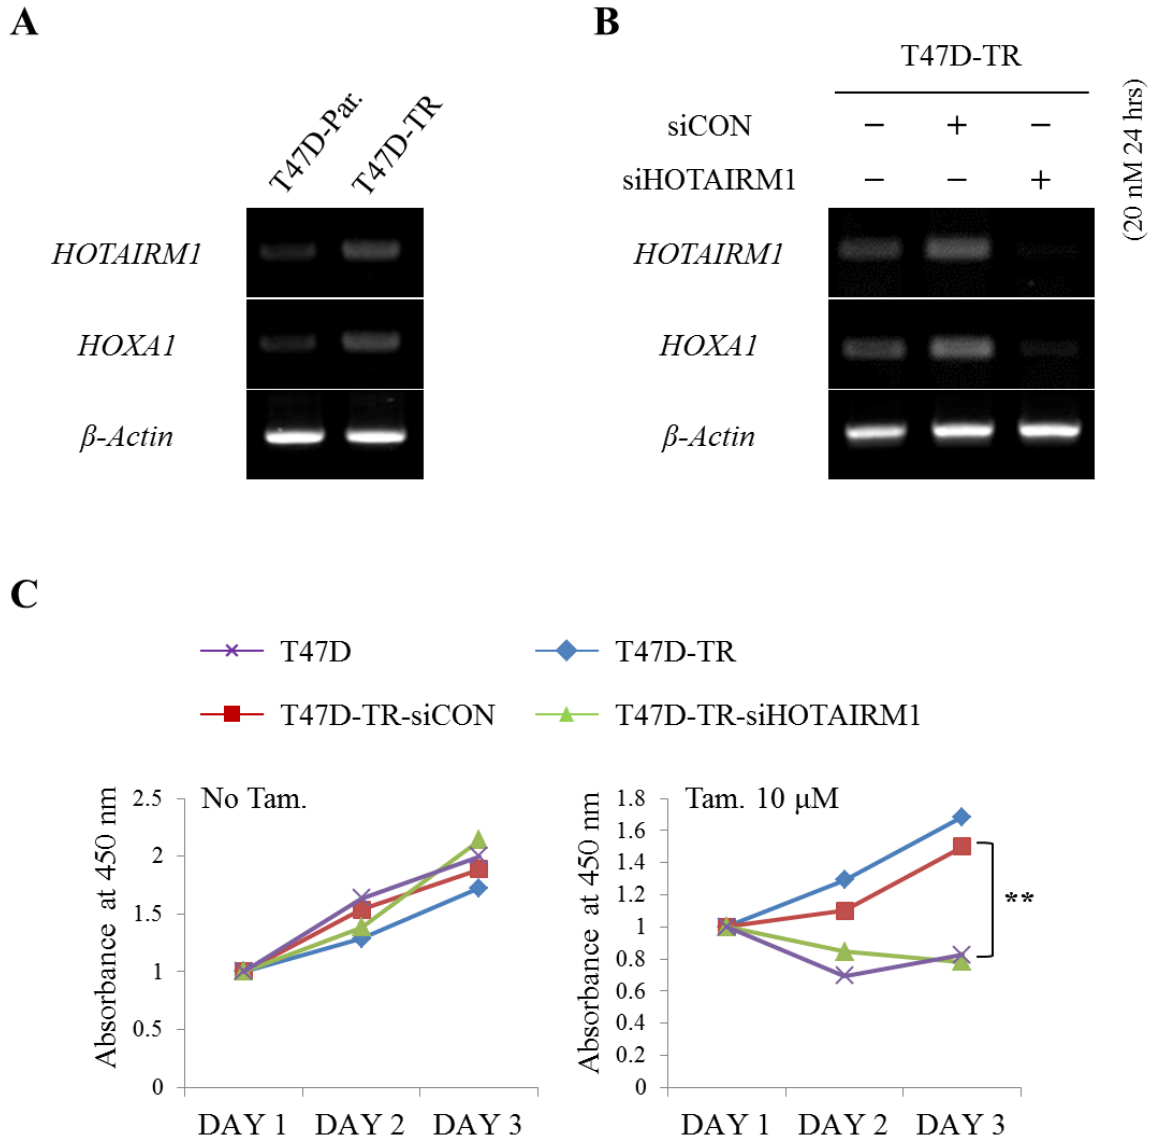

**Supplementary Figure S1. HOTAIRM1 is associated with tamoxifen resistance in T47D cells.**

(A) RT-PCR analysis of HOTAIRM1 in T47D and tamoxifen-resistant T47D (T47D-TR) cells.

(B) RT-PCR analysis of HOTAIRM1 and neighboring *HOXA1* in T47D-TR cells transiently transfected with pooled siHOTAIRM1 for 24 hours.  $\beta$ -Actin was used as an internal control.

(C) Cell viability of cells treated with siHOTAIRM1 in the absence (No Tam.– left panel) and presence of 10  $\mu$ M tamoxifen (Tam.– right panel) at days 1, 2, and 3. All experiments were performed in triplicate. \*\*\*  $p < 0.001$  compared with siCON by Student's *t*-test.

### HOTAIRM1: corr. mRNA

| Cancer    | Position/Annotation | Gene Symbol | Correlation | P-value   | Plot                                                                                |
|-----------|---------------------|-------------|-------------|-----------|-------------------------------------------------------------------------------------|
| TCGA-BRCA | ENSG00000233429.5   | HOXA1       | 0.719       | 5.65e-131 |  |
| TCGA-BRCA | ENSG00000233429.5   | HOXA3       | 0.684       | 0         |  |
| TCGA-BRCA | ENSG00000233429.5   | HOXA4       | 0.645       | 0         |  |
| TCGA-BRCA | ENSG00000233429.5   | HOXA2       | 0.637       | 3.88e-94  |  |
| TCGA-BRCA | ENSG00000233429.5   | HOXA5       | 0.618       | 2.25e-87  |  |
| TCGA-BRCA | ENSG00000233429.5   | BOC         | 0.585       | 0         |  |
| TCGA-BRCA | ENSG00000233429.5   | HOXA7       | 0.578       | 0         |  |
| TCGA-BRCA | ENSG00000233429.5   | PLAGL1      | 0.576       | 0         |  |
| TCGA-BRCA | ENSG00000233429.5   | DMD         | 0.57        | 0         |  |
| TCGA-BRCA | ENSG00000233429.5   | KLHL29      | 0.57        | 0         |  |

Showing 1 to 10 of 524 entries

**Supplementary Figure S2.** Positive correlation between HOTAIRM1 and anterior HOXA cluster genes in breast cancer tissues retrieved from TANRIC.

**A**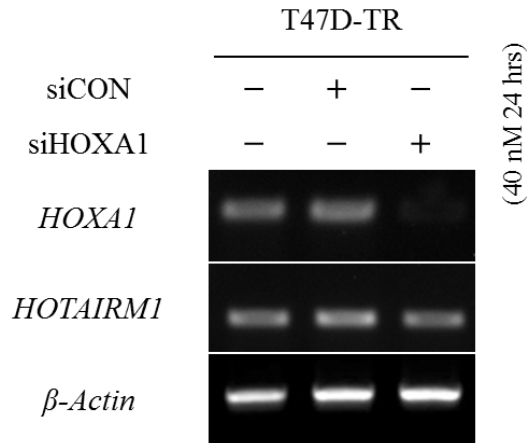**B**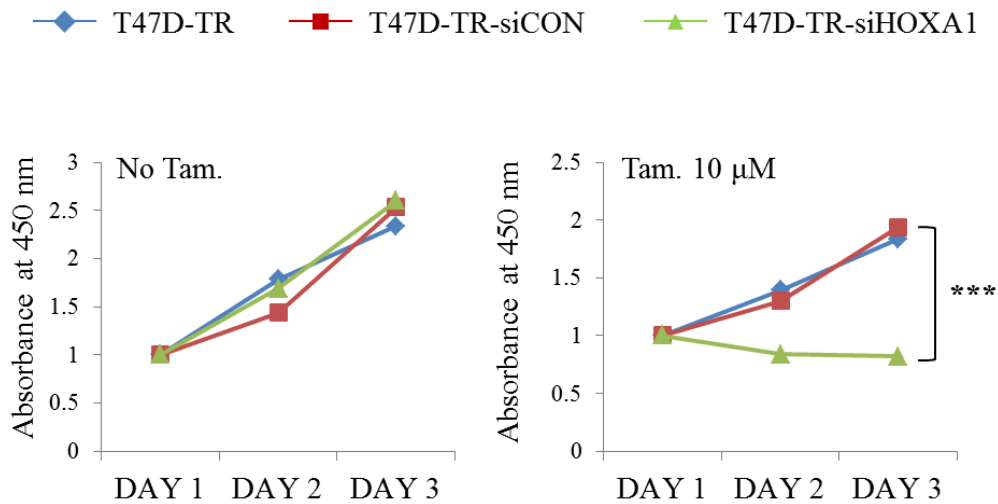

**Supplementary Figure S3.** HOTAIRM1 promotes tamoxifen resistance by regulating HOXA1 expression in T47D cells. (A) RT-PCR of HOTAIRM1 and *HOXA1* in T47D-TR cells transiently transfected with siHOXA1 for 24 hours.  $\beta$ -Actin was used as an internal control. (B) Cell viability curve of cells treated with siHOXA1 or control siCON in the absence (No Tam.– left panel) and presence of 10  $\mu$ M tamoxifen (Tam.– right panel) at days 1, 2, and 3. All experiments were performed in triplicate. \*\*\*  $p < 0.001$  compared with siCON by Student's  $t$ -test.

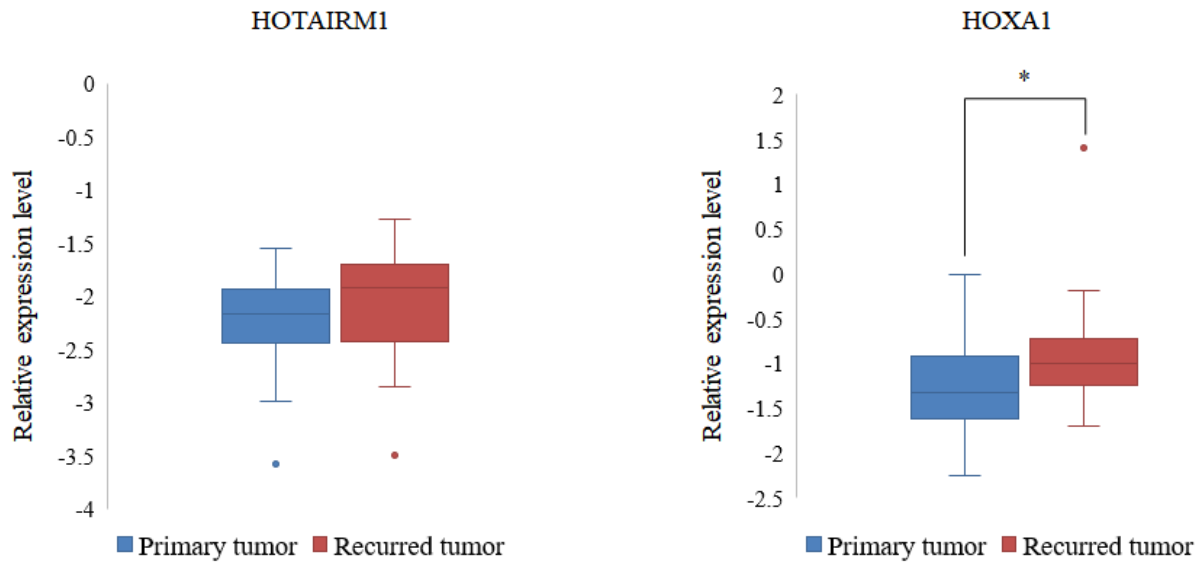

**Supplementary Figure S4.** Box plot of HOTAIRM1 and HOXA1 expressions in primary ER+ breast tumors and recurred tumors following tamoxifen mono-therapy for 5 years. Data were retrieved from GSE1379, a publicly available gene expression profiling data from 60 paired patients. \*  $p < 0.05$  compared with primary tumor by Student's  $t$ -test.

**Supplementary Table 1.** List of siRNA sequences.

| Primers    | Sense (5'-3')           | Antisense (5'-3')        |
|------------|-------------------------|--------------------------|
| HOTAIRM1-1 | CCGUUCA AUGAAAGAUGAAU   | UUCAUCUUUCAUUGAACGGU     |
| HOTAIRM1-2 | AGAAACUCCGUGUUACUCAUUU  | AAUGAGUAACACGGAGUUUCUU   |
| HOTAIRM1-3 | GUUUCUGUAGGCACUUUAUU    | AUAAAGUGCCUACAGAAACU     |
| HOTAIRM1-4 | CCUCUAUUACCAAUUUAAAU    | UUUAAAUUGGUAUAGAGGU      |
| HOXA1      | GAGGAAUCCUCAGAGAAGUU    | ACUUCUCUGAGGAUCCUCU      |
| Control    | CCUCGUGCCGUCCAUCAGGUAGU | CUACCUGAUGGAACGGCACGAGGU |
